# Supplementary material
Source: bioRxiv or medRxiv preprint supplement (https://www.biorxiv.org/highwire/filestream/117770/field_highwire_adjunct_files/0/387951-1.pdf)
Supplement: Supplementary file [file 387951-1.pdf]

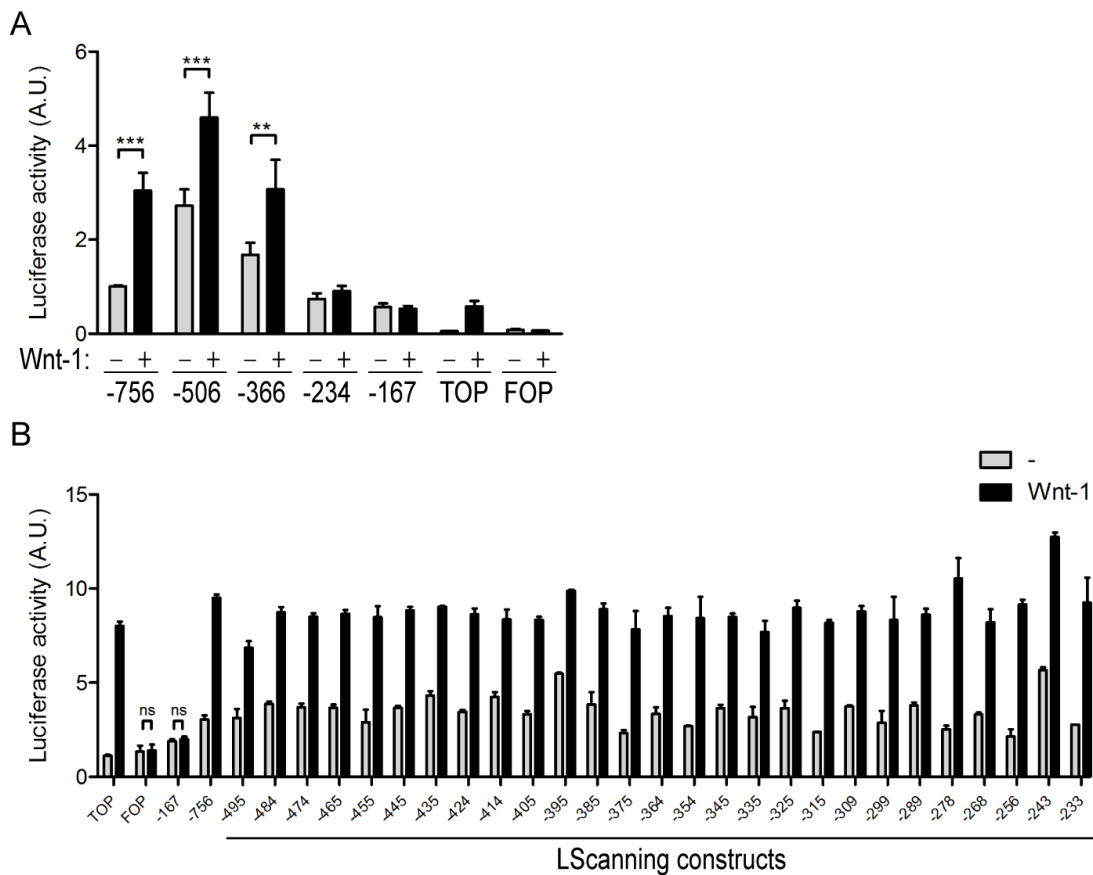

**SI Figure 1.** RhoU promoter analysis in MEF cells. (A) Cells were transiently transfected with the indicated RhoU promoter constructs or with the TOP-flash and FOP-flash positive and negative control plasmids (TOP, FOP). A SEAP-expressing vector was included as an internal control for transfection efficiency. Transfected cells were co-cultured for 24 h with wild type or WNT1-expressing HEK-293 cells. Luciferase activity was normalized to SEAP activity. Data are shown as mean  $\pm$  SEM of 4 independent experiments. \*\*= $P < 0.01$ , \*\*\*= $P < 0.001$ . (B) The indicated linker scanning (Lscanning) constructs based on the -756 RhoU-promoter fragment, along with the wild type -756 construct and the TOP and FOPflash controls were transiently transfected as above and tested for WNT1-responsiveness. Induction was always significant ( $P < 0.001$ ), with the exception of the -167 and FOP negative controls (ns, non significant). A.U., arbitrary units. Data are shown as mean  $\pm$  SEM of 4 independent experiments.

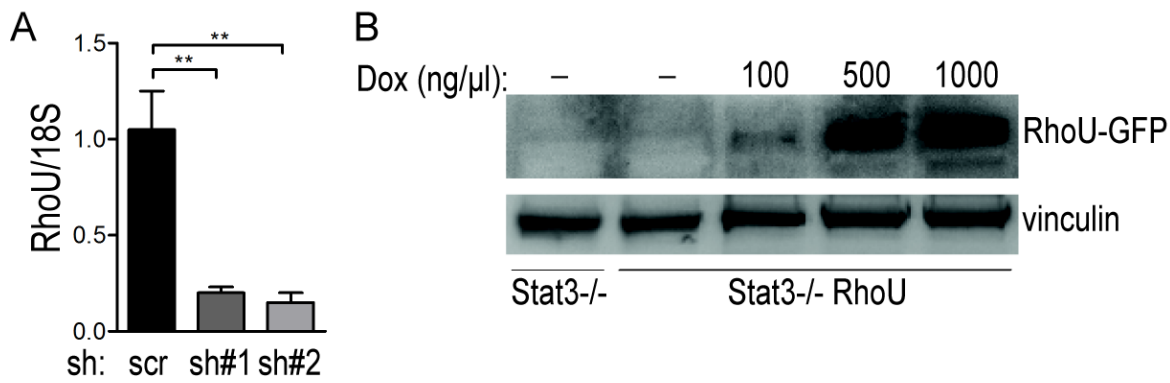

**SI Figure 2.** Manipulation of RhoU levels in MEF and MDA-MB-231 cells. (A) Lentiviral-mediated shRNA silencing of RhoU mRNA in MDA-MB-231 cells, measured by qRT-PCR upon infection with two distinct shRNA sequences (sh1, sh2) or with a control scrambled vector (scr). \*\*= $P < 0.01$ ;  $n = 4$ . (B) RhoU-GFP expression levels in Stat3<sup>-/-</sup> MEF cells either untransfected or stably transfected with a RhoU-GFP TetON construct (Stat3<sup>-/-</sup> RhoU) and stimulated with the indicated doses of doxycycline (Dox), measured by Western blot with an anti-GFP monoclonal antibody.

A

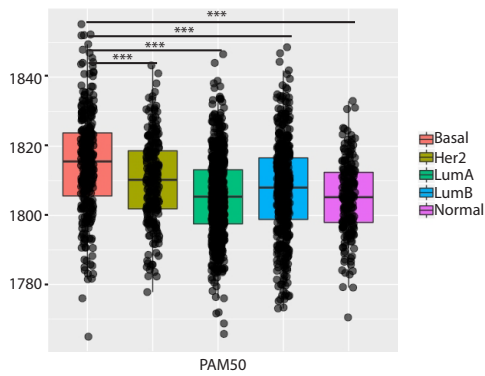

B

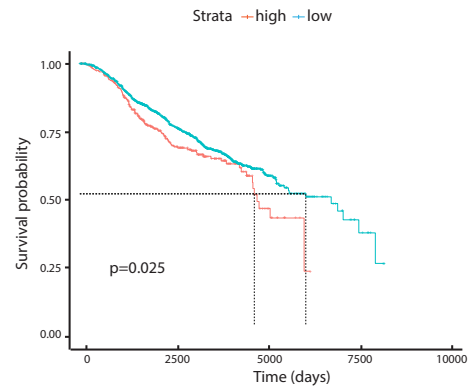

### SI Figure 3

SP1 and STAT3 can functionally cooperate to enhance tumor aggressiveness independently of the tumor subtype. (A) Boxplot showing the distribution of the SP1-S3 score in the 5 breast cancer subtypes, significantly higher in basal-like tumors.  $*=P<0.05$ ,  $**=P<0.01$ ,  $***=P<0.001$  between the indicated groups.

(B) Kaplan-Meier plot of overall survival for breast tumor patients, as a function of time in days. Patient samples from the METABRIC database, excluding basal-like tumors, were subdivided according to low or high SP1-S3 score (median value). Even A high SP1-S3 score is predictive of poor prognosis.

**SI Table 1. Primers used to generate the RhoU promoter fusions**

|               |                                              |
|---------------|----------------------------------------------|
| -1756 forward | 5'- ACTAGGTACCGAATTCAGGTGGCCCAAGGGC -3'      |
| -1316 forward | 5'- GGCCGGTACCGCATCTCTGTA CTT CAGGTTGTCC -3' |
| -756 forward  | 5'- GGCCGGTACCCGCTAACAAAGGGTGGTATCCTGC -3'   |
| -506 forward  | 5'- GGCCGGTACCCCATGATCACCCCTGCTTCTTCC -3'    |
| -366 forward  | 5'- ACTAGGTACCCTGCCCTGCCCCCTCC -3'           |
| -234 forward  | 5'- ACTAGGTACCGCTGGCTCCACCACG -3'            |
| -167 forward  | 5'- GGCCGGTACCACAGCGCCCCCGTCTGC -3'          |
| reverse       | 5'- TATCTCGAGGCCGCGAGACCAGCTGCC -3'          |

**SI Table 2. Primers used to generate the Linker Scanning constructs.**

| <b>Linker</b> | <b>Forward primer 5'-3'</b>   | <b>Reverse primer 5'-3'</b>  |
|---------------|-------------------------------|------------------------------|
| LSc -605      | CCGAATTCAACTCTCCCCCTCC        | TTGAATTCGGTGCCTGCTTTTGCAAG   |
| LSc-595       | CCGAATTCAACTCCAAACCAAGACAC    | TTGAATTCGGCTGTGGGGCCTG       |
| LSc -585      | CCGAATTCAAAGACTTGTGTGGAG      | TTGAATTCGGGGGAGAGTGCTG       |
| LSc-575       | CCGAATTCAAGTGGAGGAGCAAGG      | TTGAATTCGGTGGTTTGAGGGGG      |
| LSc -565      | CCGAATTCAAAGGGCAGCTGGAGG      | TTGAATTCGGACAAGTGTCTTGTTGG   |
| LSc-555       | CCGAATTCAAGGAGGAACAGGAAGAG    | TTGAATTCGGGCTCCTCCACACAAG    |
| LSc -545      | CCGAATTCAAGAAGAGTGGAAGAAGC    | TTGAATTCGGAGCTGCCCTTGC       |
| LSc-535       | CCGAATTCAAAGAAGCAGGGTGATCATGG | TTGAATTCGGCTGTTCCCTCAGCTGC   |
| LSc -525      | CCGAATTCAATGATCATGGTGAGAGG    | TTGAATTCGGTCCACTTCTCTGTTG    |
| LSc-515       | CCGAATTCAAGAGAGGGAGACCG       | TTGAATTCGGCCCTGCTTCTTCCAC    |
| LSc-505       | CCGAATTCAACCGCGAAAGGAG        | TTGAATTCGGACCATGATCACCTG     |
| LSc -495      | CCGAATTCAAGAGGTTGTGGAGTAG     | TTGAATTCGGTCTCCCTCTCACC      |
| LSc-484       | CCGAATTCAAGTAGAAAGAGAATAGGGGG | TTGAATTCGGCCTTTCCGCGGTCTC    |
| LSc -474      | CCGAATTCAAATAGGGGGCGACC       | TTGAATTCGGTCCACAACCTCCTTCC   |
| LSc-465       | CCGAATTCAACGACCTAAGGAGGG      | TTGAATTCGGTCTTTCTACTCCACAACC |
| LSc -455      | CCGAATTCAAAGGGAGAAGGAGGAG     | TTGAATTCGGCCCCCTATTCTCTTTC   |
| LSc-445       | CCGAATTCAAAGGAGAGGGAAGAG      | TTGAATTCGGCCTTAGGTCGCC       |
| LSc -435      | CCGAATTCAAAGAGAAAGAGCCGGG     | TTGAATTCGGCCTTCTCCCTCCTTAG   |
| LSc-424       | CCGAATTCAACGGGAGGGAAGG        | TTGAATTCGGTCCCTCTCCTCC       |
| LSc -414      | CCGAATTCAAGGGGGAACAGAAGG      | TTGAATTCGGGCTCTTCTCTTCCCTC   |
| LSc-405       | CCGAATTCAAGAAGGATGGGGAGG      | TTGAATTCGGTCCCTCCCGGC        |
| LSc -395      | CCGAATTCAAGAGGAGGGGGC         | TTGAATTCGGTGTTCCTCCCTTCC     |
| LSc-385       | CCGAATTCAACAGGGCAGGAGG        | TTGAATTCGGCCCATCCTTCTGTTC    |
| LSc -375      | CCGAATTCAAGGAAGTGGAGAGC       | TTGAATTCGGCCCCCTCCTCC        |
| LSc-364       | CCGAATTCAAGCAAGAGGAGGAAAG     | TTGAATTCGGCTCCTGCCCTGC       |
| LSc -354      | CCGAATTCAAGAAAGGAAGCTTGGG     | TTGAATTCGGTCTCCAGTCTCCTCC    |
| LSc-345       | CCGAATTCAACTTGGGAAGGAGCC      | TTGAATTCGGTCTCTTGCTCTCC      |
| LSc -335      | CCGAATTCAAAGCCGGGAAAGG        | TTGAATTCGGCTTCTTCTCCTCCTC    |
| LSc-325       | CCGAATTCAAGGGGGGTGGG          | TTGAATTCGGCCTTCCCAAGCTTCC    |
| LSc -315      | CCGAATTCAAGGATGAGAAGCC        | TTGAATTCGGTTTCCGGCTCC        |
| LSc-309       | CCGAATTCAAAGAAGCCACAGCAGG     | TTGAATTCGGCCCCCTTCCCG        |
| LSc -299      | CCGAATTCAAAGCAGGGGCCAG        | TTGAATTCGGCATCCCCCACC        |
| LSc-289       | CCGAATTCAAAGGGGTAGCTCGG       | TTGAATTCGGGTGGGCTTCTCATCC    |
| LSc -278      | CCGAATTCAAGGGGTCCGCG          | TTGAATTCGGTGGCCCCTGCTG       |
| LSc-268       | CCGAATTCAAGGTTGGCGTGG         | TTGAATTCGGGAGCTACCCCTGG      |
| LSc-256       | CCGAATTCAAGAGCCAGCTAGTCC      | TTGAATTCGGCACGCGACCCCCG      |
| LSc-242       | CCGAATTCAAGTCCAGCCGCAC        | TTGAATTCGGCACCACGCCAACC      |
| LSc-233       | CCGAATTCAAACGTTTCGAGGCG       | TTGAATTCGGTAGCTGGCTCCACC     |

**SI Table 3.** Primers used for qRT- PCR.

| <b>Gene</b>               | <b>Forward primer 5'-3'</b> | <b>Reverse primer 5'-3'</b> | <b>Probe</b> |
|---------------------------|-----------------------------|-----------------------------|--------------|
| <i>Mus musculus</i> RhoU  | ACGGCCTTCGACAACCTTCT        | ACTCATCCTGTCCTGCAGTGT       | 78           |
| <i>Homo sapiens</i> RhoU  | GACTCCAACCTCTGTGACACTGC     | ATGAGGGGGCTCACGACACT        | 4            |
| <i>Homo sapiens</i> WNT5a | AGGGCTCCTACGAGAGTGCT        | GACACCCCATGGCACTTG          | /            |
| <i>Homo sapiens</i> WNT5b | AGAAGAACCTTTGCCAAAGGA       | CTACGTCTGCCATCTTATACAC      | /            |
| <i>Homo sapiens</i> Ror2  | GTGACCTTTGTAGACTTTCC        | ATTCTGTACATCTTGGTCCC        | /            |
| <i>Homo sapiens</i> Ror1  | GATTAGAAACCTCGACACCAC       | GCAAAGACTCCATAGACGG         | /            |

**SI Table 4.** List of genes included in the SP1-STAT3 signature.TF.x, SP1; TF.y, STAT3. The chromosome, genomic coordinates of the peaks (Start.x, y; End x,y) and of the genes, and the distance between the peak and the gene (AbsDist. X, y), as well as the signature each gene belongs to, are indicated.

| Gene       | TF.x | chr.x | Start.x   | End.x     | GeneChr | GeneStart | GeneEnd   | AbsDi | TF.y  | chr.y | Start.y   | End.y     | AbsDist.y | Signature          |
|------------|------|-------|-----------|-----------|---------|-----------|-----------|-------|-------|-------|-----------|-----------|-----------|--------------------|
| ACADM      | SP1  | chr1  | 76190222  | 76190574  | 1       | 76190031  | 76229364  | 191   | STAT3 | chr1  | 76187964  | 76188280  | 2067      | Wnt non canonical  |
| ALAS1      | SP1  | chr3  | 52231817  | 52232137  | 16      | 52232098  | 52248343  | 281   | STAT3 | chr3  | 52227120  | 52227444  | 2111      | Wnt non canonical  |
| ANGPTL4    | SP1  | chr19 | 8426835   | 8427171   | 11      | 8429010   | 8439259   | 2175  | STAT3 | chr19 | 8426994   | 8427293   | 2016      | Wnt non canonical  |
| ANPEP      | SP1  | chr15 | 90328748  | 90329084  | 7       | 90328125  | 90358072  | 623   | STAT3 | chr15 | 90325724  | 90326040  | 2401      | Wnt non canonical  |
| AP2A1      | SP1  | chr19 | 50268801  | 50269125  | 11      | 50270179  | 50310369  | 553   | STAT3 | chr19 | 50268695  | 50269159  | 766       | Wnt non canonical  |
| AP2B1      | SP1  | chr17 | 33914130  | 33914579  | 9       | 33914281  | 34053436  | 151   | STAT3 | chr17 | 33915581  | 33915936  | 1300      | Wnt non canonical  |
| AP2M1      | SP1  | chr3  | 183892287 | 183892641 | 16      | 183892633 | 183901879 | 346   | STAT3 | chr3  | 183892117 | 183892619 | 516       | Wnt non canonical  |
| ARRB2      | SP1  | chr17 | 4611768   | 4612164   | 9       | 4613788   | 4624795   | 310   | STAT3 | chr17 | 4613000   | 4613280   | 788       | Wnt non canonical  |
| BAK1       | SP1  | chr6  | 33538602  | 33539357  | 19      | 33540322  | 33548070  | 1720  | STAT3 | chr6  | 33538587  | 33538997  | 1735      | IL6                |
| BHLHE40    | SP1  | chr3  | 5020792   | 5021128   | 16      | 5021096   | 5026866   | 304   | STAT3 | chr3  | 5021923   | 5022306   | 827       | Wnt non canonical  |
| BTRC       | SP1  | chr10 | 103113462 | 103113853 | 2       | 103113789 | 103317078 | 327   | STAT3 | chr10 | 103113422 | 103113867 | 367       | Wnt non canonical  |
| CALD1      | SP1  | chr7  | 134464178 | 134464502 | 20      | 134464163 | 134655480 | 15    | STAT3 | chr7  | 134463033 | 134463349 | 246       | Wnt non canonical  |
| CD14       | SP1  | chr5  | 140012649 | 140012885 | 18      | 140011312 | 140013035 | 1337  | STAT3 | chr5  | 140009809 | 140010305 | 511       | IL6                |
| CD38       | SP1  | chr4  | 15779766  | 15780086  | 17      | 15779887  | 15854866  | 121   | STAT3 | chr4  | 15775760  | 15776040  | 1181      | IL6                |
| CD9        | SP1  | chr12 | 6304999   | 6305335   | 4       | 6308872   | 6347437   | 3873  | STAT3 | chr12 | 6305028   | 6305322   | 3844      | IL6                |
| CDC42      | SP1  | chr1  | 22375088  | 22375408  | 1       | 22379119  | 22417296  | 153   | STAT3 | chr1  | 22380948  | 22381224  | 1829      | Wnt non canonical  |
| CPT2       | SP1  | chr1  | 53661813  | 53662149  | 1       | 53662100  | 53679869  | 125   | STAT3 | chr1  | 53662284  | 53662580  | 184       | Wnt non canonical  |
| CFEB1      | SP1  | chr2  | 208394233 | 208394553 | 12      | 208394615 | 208441649 | 382   | STAT3 | chr2  | 208393141 | 208393421 | 666       | Wnt non canonical  |
| CRY2       | SP1  | chr11 | 45864687  | 45865007  | 3       | 45868668  | 45904799  | 67    | STAT3 | chr11 | 45868357  | 45868767  | 311       | Wnt non canonical  |
| CSF1       | SP1  | chr1  | 110448739 | 110449059 | 1       | 110453232 | 110467824 | 4493  | STAT3 | chr1  | 110453257 | 110453573 | 25        | IL6                |
| CSF2       | SP1  | chr5  | 131409292 | 131409628 | 18      | 131409484 | 131411863 | 192   | STAT3 | chr5  | 131409272 | 131409552 | 212       | IL6                |
| CTGF       | SP1  | chr6  | 132272453 | 132272777 | 19      | 132269315 | 132272518 | 3138  | STAT3 | chr6  | 132270745 | 132271089 | 1430      | Wnt non canonical  |
| CUL1       | SP1  | chr7  | 148395402 | 148395702 | 20      | 148395932 | 148498202 | 530   | STAT3 | chr7  | 148392769 | 148393049 | 3163      | Wnt non canonical  |
| DGKA       | SP1  | chr12 | 56323778  | 56324114  | 4       | 56324945  | 56347807  | 510   | STAT3 | chr12 | 56324666  | 56324952  | 279       | Wnt non canonical  |
| DGKD       | SP1  | chr2  | 234262270 | 234262606 | 12      | 234263152 | 234380743 | 212   | STAT3 | chr2  | 234259396 | 234259795 | 3756      | Wnt non canonical  |
| DGKH       | SP1  | chr13 | 42614570  | 42614890  | 5       | 42614171  | 42817033  | 399   | STAT3 | chr13 | 42712017  | 42712340  | 160       | Wnt non canonical  |
| DGKZ       | SP1  | chr11 | 46368687  | 46368995  | 3       | 46366816  | 46402104  | 268   | STAT3 | chr11 | 46358362  | 46358638  | 3908      | Wnt non canonical  |
| EBI3       | SP1  | chr19 | 4229161   | 4229481   | 11      | 4229539   | 4237525   | 378   | STAT3 | chr19 | 4229185   | 4229465   | 354       | IL6                |
| ESRRA      | SP1  | chr11 | 64072566  | 64072920  | 3       | 64072999  | 64084215  | 349   | STAT3 | chr11 | 64078640  | 64078969  | 4942      | Wnt non canonical  |
| FAS        | SP1  | chr10 | 90750994  | 90751314  | 2       | 90750315  | 90776818  | 50    | STAT3 | chr10 | 90750132  | 90750542  | 15        | IL6                |
| FURIN      | SP1  | chr15 | 91417453  | 91417645  | 7       | 91414768  | 91426688  | 1346  | STAT3 | chr15 | 91412821  | 91413261  | 1000      | Wnt non canonical  |
| GLI3P1     | SP1  | chr12 | 75874448  | 75874768  | 4       | 75874512  | 75895716  | 64    | STAT3 | chr12 | 75874294  | 75874610  | 218       | Wnt non canonical  |
| GNAI2      | SP1  | chr3  | 50263526  | 50263846  | 16      | 50264119  | 50296786  | 347   | STAT3 | chr3  | 50288622  | 50288963  | 4297      | Wnt non canonical  |
| GNB2       | SP1  | chr7  | 100270977 | 100271477 | 20      | 100271362 | 100276792 | 385   | STAT3 | chr7  | 100270927 | 100271193 | 435       | Wnt non canonical  |
| GNG7       | SP1  | chr19 | 2507150   | 2507486   | 11      | 2511217   | 2702746   | 4067  | STAT3 | chr19 | 2507181   | 2507525   | 4036      | Wnt non canonical  |
| GNGT2      | SP1  | chr17 | 47287833  | 47288153  | 9       | 47283595  | 47287936  | 4238  | STAT3 | chr17 | 47287699  | 47288109  | 4104      | Wnt non canonical  |
| GRB2       | SP1  | chr17 | 73310035  | 73310355  | 9       | 73314156  | 73401789  | 2077  | STAT3 | chr17 | 73316161  | 73316571  | 2005      | IL6                |
| H2AFX      | SP1  | chr11 | 118966140 | 118966512 | 3       | 118964583 | 118966177 | 1557  | STAT3 | chr11 | 118966349 | 118966670 | 1766      | Wnt non canonical  |
| H2AFZ      | SP1  | chr4  | 100871345 | 100871695 | 17      | 100869243 | 100871512 | 2102  | STAT3 | chr4  | 100871342 | 100871653 | 2099      | Wnt non canonical  |
| H3F3B      | SP1  | chr17 | 73775788  | 73776223  | 9       | 73772514  | 73776016  | 3274  | STAT3 | chr17 | 73775389  | 73775702  | 2875      | Wnt non canonical  |
| HAX1       | SP1  | chr1  | 154244817 | 154245137 | 1       | 154245038 | 154248351 | 221   | STAT3 | chr1  | 154244769 | 154245179 | 269       | IL6                |
| HIST1H2AB  | SP1  | chr6  | 26033770  | 26034046  | 19      | 26033319  | 26033796  | 451   | STAT3 | chr6  | 26033736  | 26034266  | 417       | Wnt non canonical  |
| HIST1H2AC  | SP1  | chr6  | 26124090  | 26124483  | 19      | 26124372  | 26124918  | 282   | STAT3 | chr6  | 26123950  | 26124540  | 422       | Wnt non canonical  |
| HIST1H2AD  | SP1  | chr6  | 26199420  | 26199762  | 19      | 26199011  | 26199521  | 409   | STAT3 | chr6  | 26199425  | 26199769  | 414       | Wnt non canonical  |
| HIST1H2BB  | SP1  | chr6  | 26043914  | 26044266  | 19      | 26043454  | 26043885  | 460   | STAT3 | chr6  | 26043860  | 26044270  | 406       | Wnt non canonical  |
| HIST1H2BC  | SP1  | chr6  | 26121268  | 26121604  | 19      | 26123694  | 26124132  | 396   | STAT3 | chr6  | 26119272  | 26119552  | 256       | Wnt non canonical  |
| HIST1H2BD  | SP1  | chr6  | 26158017  | 26158409  | 19      | 26158348  | 26158835  | 331   | STAT3 | chr6  | 26157955  | 26158610  | 393       | Wnt non canonical  |
| HIST1H2BJ  | SP1  | chr6  | 27099571  | 27099940  | 19      | 27100094  | 27100575  | 431   | STAT3 | chr6  | 27100455  | 27100963  | 361       | Wnt non canonical  |
| HIST1H2BK  | SP1  | chr6  | 27106829  | 27107185  | 19      | 27106071  | 27114637  | 439   | STAT3 | chr6  | 27106803  | 27107213  | 435       | Wnt non canonical  |
| HIST1H2BN  | SP1  | chr6  | 27807616  | 27807762  | 19      | 27806439  | 27806888  | 1177  | STAT3 | chr6  | 27806051  | 27806465  | 388       | Wnt non canonical  |
| HIST1H2BO  | SP1  | chr6  | 27860812  | 27861256  | 19      | 27861202  | 27861669  | 390   | STAT3 | chr6  | 27860924  | 27861268  | 278       | Wnt non canonical  |
| HIST1H3H   | SP1  | chr6  | 27777602  | 27777938  | 19      | 27777841  | 27778314  | 239   | STAT3 | chr6  | 27777626  | 27777970  | 215       | Wnt non canonical  |
| HIST2H2AA3 | SP1  | chr1  | 149817075 | 149817399 | 1       | 149813784 | 149814318 | 3291  | STAT3 | chr1  | 149815753 | 149816071 | 1969      | Wnt non canonical  |
| HIST2H2BE  | SP1  | chr1  | 149858165 | 149858525 | 1       | 149856009 | 149858232 | 2156  | STAT3 | chr1  | 149856474 | 149856884 | 465       | Wnt non canonical  |
| HIST3H2BB  | SP1  | chr1  | 228645515 | 228645839 | 1       | 228645807 | 228646259 | 292   | STAT3 | chr1  | 228645546 | 228645890 | 261       | Wnt non canonical  |
| HMOX1      | SP1  | chr22 | 35772957  | 35773304  | 15      | 35777059  | 35790207  | 1896  | STAT3 | chr22 | 35772907  | 35773453  | 4152      | IL6                |
| HRAS       | SP1  | chr11 | 535499    | 535835    | 3       | 532241    | 535567    | 3258  | STAT3 | chr11 | 534581    | 534897    | 2340      | Wnt non canonical  |
| IFNGR2     | SP1  | chr21 | 34777757  | 34778093  | 14      | 34775201  | 34809828  | 2556  | STAT3 | chr21 | 34774005  | 34774324  | 593       | IL6                |
| IL10RB     | SP1  | chr21 | 34639186  | 34639506  | 14      | 34638664  | 34669539  | 522   | STAT3 | chr21 | 34638577  | 34638837  | 87        | IL6                |
| IL13RA1    | SP1  | chrX  | 117860833 | 117861169 | 23      | 117861558 | 117928496 | 725   | STAT3 | chrX  | 117857419 | 117857695 | 211       | IL6                |
| IL17RB     | SP1  | chr3  | 53880379  | 53880715  | 16      | 53880576  | 53899827  | 197   | STAT3 | chr3  | 53880382  | 53880658  | 194       | IL6                |
| IL1R1      | SP1  | chr2  | 102682265 | 102682601 | 12      | 102686835 | 102781830 | 209   | STAT3 | chr2  | 102682283 | 102682627 | 197       | IL6                |
| IL1R2      | SP1  | chr2  | 102615963 | 102616299 | 12      | 102615423 | 102644885 | 540   | STAT3 | chr2  | 102618318 | 102618594 | 2895      | IL6                |
| IL4R       | SP1  | chr16 | 27324567  | 27324903  | 8       | 27325229  | 27376099  | 662   | STAT3 | chr16 | 27324694  | 27325034  | 420       | IL6                |
| IRF9       | SP1  | chr14 | 24630211  | 24630620  | 6       | 24630421  | 24635774  | 210   | STAT3 | chr14 | 24630199  | 24630609  | 222       | IL6                |
| ITGA4      | SP1  | chr2  | 182321361 | 182321681 | 12      | 182321618 | 182340945 | 257   | STAT3 | chr2  | 182321334 | 182321744 | 284       | IL6                |
| ITGB3      | SP1  | chr17 | 45329657  | 45329993  | 9       | 45331207  | 45390077  | 1550  | STAT3 | chr17 | 45334941  | 45335620  | 3734      | IL6/Wnt non canoni |







**SI Table 5.**

**Total Binding Affinity of JASPAR Transcription Factors (TF) with the mouse RhoU promoter.** The table shows a list of the 130 transcription factors described in the JASPAR Core Vertebrata database (downloaded November 2009), ranked according to their total binding affinity with the WNT-responsive region of the RhoU promoter (-756 to -235). A rank of 0.99 means that the affinity value with the RhoU promoter is higher compared to that shown by 99% of all gene promoters.

| <b>TF</b>   | <b>rank</b>         |
|-------------|---------------------|
| MZF1_5-13   | 0.995208285029755   |
| ZNF354C     | 0.99408764201252031 |
| ETS1        | 0.98334492619213232 |
| MZF1_1-4    | 0.95969549424221345 |
| Mycn        | 0.95749285107040727 |
| Myc         | 0.95617899373985626 |
| PPARG::RXRA | 0.95204420743488682 |
| Nr2e3       | 0.94292449184635596 |
| Myf         | 0.94010356287193753 |
| znf143      | 0.93426849060978434 |
| INSM1       | 0.92453048921864134 |
| EWSR1-FLI1  | 0.91869541695648815 |
| ELK1        | 0.90644562949223273 |
| SP1         | 0.89539377077053872 |
| Arnt::Ahr   | 0.87727026818146692 |
| Spz1        | 0.8758791251255893  |
| RREB1       | 0.87421748203106886 |
| ELF5        | 0.87309683901383417 |
| PLAG1       | 0.86865290980755849 |
| SPI1        | 0.85632583661797668 |
| Esrrb       | 0.85168869309838469 |
| BRCA1       | 0.83766133395161912 |

|             |                     |
|-------------|---------------------|
| Sox17       | 0.83731354818764969 |
| PBX1        | 0.83553597650513955 |
| TLX1::NFIC  | 0.82943040420434344 |
| Zfx         | 0.82417497488213931 |
| REST        | 0.81621454517350644 |
| ESR1        | 0.80983847283406751 |
| RUNX1       | 0.80879511554215933 |
| Egr1        | 0.80411932915990414 |
| ESR2        | 0.80033232861890413 |
| Klf4        | 0.79449725635675095 |
| USF1        | 0.79306747043821002 |
| GATA3       | 0.77548496792642396 |
| Pax5        | 0.76779503825643403 |
| NR3C1       | 0.76601746657392378 |
| Pax4        | 0.76439446634206665 |
| CTCF        | 0.76358296622613808 |
| Gfi         | 0.7626941803848829  |
| Sox2        | 0.75589303655614803 |
| GABPA       | 0.75496560785222966 |
| SPIB        | 0.74611639230234172 |
| MYC::MAX    | 0.74244532034933153 |
| Foxd3       | 0.73232089033155578 |
| TFAP2A      | 0.71002395857485123 |
| SOX9        | 0.70299095757013674 |
| Stat3       | 0.69924259989179993 |
| NHLH1       | 0.69456681350954474 |
| Myb         | 0.68958188422598343 |
| SRF         | 0.68757245536749367 |
| Tal1::Gata1 | 0.68223974031996293 |

|               |                     |
|---------------|---------------------|
| HNF4A         | 0.67640466805780974 |
| HIF1A::ARNT   | 0.65801066543009501 |
| E2F1          | 0.63888244841177833 |
| Hand1::Tcfe2a | 0.6313857330551047  |
| IRF2          | 0.62976273282324757 |
| RXR::RAR_DR5  | 0.62856480408068627 |
| GATA2         | 0.62728958961279857 |
| Zfp423        | 0.62543473220496171 |
| NFATC2        | 0.61187108741015539 |
| MAX           | 0.61183244454749208 |
| FEV           | 0.5974959424994204  |
| SRY           | 0.59479094211299177 |
| NFKB1         | 0.58733286961898135 |
| NFIC          | 0.58273436896205266 |
| Arnt          | 0.58227065461009353 |
| TAL1::TCF3    | 0.58049308292758328 |
| TEAD1         | 0.57527629646804235 |
| Nkx3-2        | 0.5626014375144911  |
| REL           | 0.53759950537135792 |
| ARID3A        | 0.5313393616199088  |
| SOX10         | 0.5263930751990108  |
| Lhx3          | 0.52055800293685761 |
| NF-kappaB     | 0.51823943117706162 |
| Hltf          | 0.51584357369193912 |
| Nkx2-5        | 0.4831130690161527  |
| Gata1         | 0.48017621145374451 |
| Ddit3::Cebpa  | 0.47078599582657082 |
| MIZF          | 0.44914599273514183 |
| NR1H2::RXRA   | 0.44377463482494783 |

|              |                     |
|--------------|---------------------|
| ELK4         | 0.44137877733982533 |
| EBF1         | 0.44033542004791715 |
| Pou5f1       | 0.43175670453667209 |
| NFE2L1::MafG | 0.42881984697426384 |
| STAT1        | 0.42093670299095759 |
| IRF1         | 0.41888863126980447 |
| En1          | 0.41884998840714122 |
| RELA         | 0.41684055954865135 |
| Sox5         | 0.41363320194760028 |
| TP53         | 0.41119870159981453 |
| Mafb         | 0.40710255815750829 |
| YY1          | 0.39280469897209985 |
| RXRA::VDR    | 0.39210912744416104 |
| Pax6         | 0.38774248396321198 |
| Tcfcp2l1     | 0.38720148388592629 |
| NR2F1        | 0.36532962361851767 |
| NKX3-1       | 0.36053790864827268 |
| PPARG        | 0.33855011979287425 |
| NR4A2        | 0.32552747507535357 |
| ZEB1         | 0.31265940180848595 |
| HNF1B        | 0.28560939794419971 |
| RORA_1       | 0.28460468351495477 |
| Prrx2        | 0.27471211067315865 |
| Pax2         | 0.26791096684442384 |
| MEF2A        | 0.26586289512327071 |
| T            | 0.25512017930288278 |
| FOXC1        | 0.21535667362238195 |
| HNF1A        | 0.21354045907720845 |
| Evi1         | 0.18467424066774868 |

|        |                      |
|--------|----------------------|
| Foxq1  | 0.18254888322126903  |
| FOXI1  | 0.17779581111368731  |
| HOXA5  | 0.17327459618208516  |
| FOXO3  | 0.15248473606924801  |
| Nobox  | 0.15202102171728882  |
| Pdx1   | 0.14823402117628873  |
| CREB1  | 0.13181080454440064  |
| NFYA   | 0.12400494628642089  |
| FOXD1  | 0.12280701754385964  |
| CEBPA  | 0.1195610170801453   |
| FOXL1  | 0.096877656696808104 |
| FOXF2  | 0.09571837081691012  |
| Ar     | 0.091660870237267184 |
| NFE2L2 | 0.091081227297318185 |
| FOXA1  | 0.082966226138032312 |
| HLF    | 0.079372439910348563 |
| RORA_2 | 0.064842723548960507 |
| TBP    | 0.052322436046062293 |
| Foxa2  | 0.049385578483654068 |
| NFIL3  | 0.046989720998531569 |
| AP1    | 0.038449648349949767 |

## Supporting Information Table 6.

Results of the GO analysis performed on the genes of the SP1-S3 signature. Same colors indicate related biological processes mentioned in the text.

| PANTHER GO-Slim Biological Process                         | Homo sapiens-Background | Genes in Anr | expected | over/under | fold Enrichm | raw P-value |
|------------------------------------------------------------|-------------------------|--------------|----------|------------|--------------|-------------|
| chromatin assembly (GO:0031497)                            | 40                      | 10           | 0,28     | +          | 36,28        | 1,34E-12    |
| chromatin organization (GO:0006325)                        | 273                     | 17           | 1,88     | +          | 9,04         | 1,58E-11    |
| cellular process (GO:0009987)                              | 8247                    | 93           | 56,83    | +          | 1,64         | 1,90E-09    |
| metabolic process (GO:0008152)                             | 5878                    | 69           | 40,51    | +          | 1,7          | 6,03E-07    |
| intracellular signal transduction (GO:0035556)             | 1071                    | 23           | 7,38     | +          | 3,12         | 1,50E-06    |
| proteolysis (GO:0006508)                                   | 448                     | 14           | 3,09     | +          | 4,53         | 3,65E-06    |
| signal transduction (GO:0007165)                           | 2318                    | 35           | 15,97    | +          | 2,19         | 7,42E-06    |
| regulation of gene expression, epigenetic (GO:0040029)     | 71                      | 6            | 0,49     | +          | 12,26        | 1,47E-05    |
| DNA metabolic process (GO:0006259)                         | 391                     | 12           | 2,69     | +          | 4,45         | 2,21E-05    |
| organelle organization (GO:0006996)                        | 1212                    | 22           | 8,35     | +          | 2,63         | 3,44E-05    |
| primary metabolic process (GO:0044238)                     | 4753                    | 54           | 32,75    | +          | 1,65         | 8,59E-05    |
| cell communication (GO:0007154)                            | 2686                    | 36           | 18,51    | +          | 1,94         | 8,38E-05    |
| response to stimulus (GO:0050896)                          | 2677                    | 36           | 18,45    | +          | 1,95         | 8,08E-05    |
| transcription, DNA-dependent (GO:0006351)                  | 1020                    | 18           | 7,03     | +          | 2,56         | 2,66E-04    |
| cellular component biogenesis (GO:0044085)                 | 776                     | 15           | 5,35     | +          | 2,81         | 3,52E-04    |
| MAPK cascade (GO:0000165)                                  | 340                     | 9            | 2,34     | +          | 3,84         | 6,86E-04    |
| nitrogen compound metabolic process (GO:0006807)           | 2524                    | 31           | 17,39    | +          | 1,78         | 1,26E-03    |
| cellular component organization (GO:0016043)               | 1964                    | 25           | 13,53    | +          | 1,85         | 2,50E-03    |
| cellular component organization or biogenesis (GO:0071840) | 2099                    | 26           | 14,46    | +          | 1,8          | 3,22E-03    |
